# Supplementary material for: A Machine Learning Model for Food Source Attribution of Listeria monocytogenes
Source: MDPI journal article supplement (doi:10.3390/pathogens11060691), 2022-06-16
Supplement: s1 [file s1]

**Supplementary Table S3. *Listeria monocytogenes* isolates (indicated by their BioSample numbers) from food sources and clinical samples used to generate cgMLST profiles.**

| Dairy         |              | Fruits       |              |              |              | Leafy greens |              | Meat         |              |
|---------------|--------------|--------------|--------------|--------------|--------------|--------------|--------------|--------------|--------------|
| SAMN05179419  | SAMN04547037 | SAMN16826415 | SAMN03278639 | SAMN02937460 | SAMN10083734 | SAMN21582197 | SAMN01939119 | SAMN13898671 | SAMN16816525 |
| SAMN022923525 | SAMN04575417 | SAMN15717930 | SAMN02999666 | SAMN02937456 | SAMN15970345 | SAMN21582205 | SAMN01939119 | SAMN13898660 | SAMN16816786 |
| SAMN022923524 | SAMN04575421 | SAMN16826096 | SAMN02999665 | SAMN02937455 | SAMN10026580 | SAMN21582200 | SAMN01816214 | SAMN13898627 | SAMN17188240 |
| SAMN022923526 | SAMN04575440 | SAMN16826889 | SAMN03287381 | SAMN02937448 | SAMN10083718 | SAMN21582199 | SAMN01816207 | SAMN13898669 | SAMN17188248 |
| SAMN022923527 | SAMN04506949 | SAMN16825957 | SAMN03287038 | SAMN02937447 | SAMN15913265 | SAMN19716581 | SAMN01939127 | SAMN13898677 | SAMN18800556 |
| SAMN022923663 | SAMN04506944 | SAMN16826920 | SAMN05058062 | SAMN02937446 |              | SAMN19716580 | SAMN03787619 | SAMN13898664 | SAMN18800705 |
| SAMN022922153 | SAMN04506947 | SAMN06330455 | SAMN05058067 | SAMN02937445 |              | SAMN01816208 | SAMN04244459 | SAMN13898688 | SAMN16814138 |
| SAMN022922152 | SAMN04539453 | SAMN03702255 | SAMN05058070 | SAMN02937465 |              | SAMN03329999 | SAMN04244460 | SAMN13898640 | SAMN18800706 |
| SAMN022922151 | SAMN04575433 | SAMN04929605 | SAMN05058073 | SAMN02937466 |              | SAMN03329998 | SAMN04244461 | SAMN13898639 | SAMN18800642 |
| SAMN022922150 | SAMN04506954 | SAMN04301827 | SAMN05058580 | SAMN02937469 |              | SAMN02582706 | SAMN04244462 | SAMN13898697 | SAMN16816955 |
| SAMN02347441  | SAMN04506952 | SAMN04929616 | SAMN05058583 | SAMN02937470 |              | SAMN01939120 | SAMN04244463 | SAMN13898673 | SAMN17188178 |
| SAMN03339953  | SAMN04506953 | SAMN02567781 | SAMN05058586 | SAMN02937464 |              | SAMN04480762 | SAMN02569969 | SAMN06446248 | SAMN16822078 |
| SAMN02292906  | SAMN04506942 | SAMN04929612 | SAMN05058729 | SAMN02937467 |              | SAMN04480763 | SAMN02567858 | SAMN05191816 | SAMN16825972 |
| SAMN022922901 | SAMN04539455 | SAMN04347223 | SAMN05058733 | SAMN02937468 |              | SAMN05213462 | SAMN02567856 | SAMN07409542 | SAMN17188231 |
| SAMN022921367 | SAMN04506963 | SAMN04347219 | SAMN05058736 | SAMN02292106 |              | SAMN02709403 | SAMN02567857 | SAMN04992025 | SAMN17188774 |
| SAMN022922940 | SAMN04506957 | SAMN04301828 | SAMN15717907 | SAMN04929620 |              | SAMN05721602 |              | SAMN21220912 | SAMN17188778 |
| SAMN022998027 | SAMN04506937 | SAMN02923601 | SAMN15717939 | SAMN02953954 |              | SAMN05721610 |              | SAMN21220914 | SAMN16825943 |
| SAMN13569405  | SAMN04575430 | SAMN02934656 | SAMN02902857 | SAMN02953957 |              | SAMN05721609 |              | SAMN21220905 | SAMN16813131 |
| SAMN13747397  | SAMN04539445 | SAMN02934655 | SAMN02902859 | SAMN02953956 |              | SAMN05721543 |              | SAMN21220915 | SAMN03357032 |
| SAMN13747395  | SAMN04539444 | SAMN02850636 | SAMN03024043 | SAMN02953953 |              | SAMN05721611 |              | SAMN21220911 | SAMN03357082 |
| SAMN06958595  | SAMN04506943 | SAMN02850635 | SAMN03024041 | SAMN02924020 |              | SAMN04450321 |              | SAMN21220913 |              |
| SAMN06958594  | SAMN04539447 | SAMN07554887 | SAMN03024044 | SAMN02924025 |              | SAMN04450323 |              | SAMN22160592 |              |
| SAMN02713589  | SAMN08287555 | SAMN06555603 | SAMN03024033 | SAMN02924028 |              | SAMN04450325 |              | SAMN22160580 |              |
| SAMN02318984  | SAMN08287520 | SAMN06555609 | SAMN03024039 | SAMN03135513 |              | SAMN04450327 |              | SAMN05179365 |              |
| SAMN02318986  | SAMN04506959 | SAMN06555608 | SAMN03024031 | SAMN03135515 |              | SAMN05721545 |              | SAMN03267996 |              |
| SAMN02318985  | SAMN04506948 | SAMN06555611 | SAMN02902858 | SAMN03135514 |              | SAMN05577724 |              | SAMN05179363 |              |
| SAMN06620527  | SAMN04547029 | SAMN06555604 | SAMN02902860 | SAMN03135539 |              | SAMN21580652 |              | SAMN06113187 |              |
| SAMN10397001  | SAMN04539448 | SAMN06555605 | SAMN08274613 | SAMN06645599 |              | SAMN23523467 |              | SAMN06113186 |              |
| SAMN06620523  | SAMN04539449 | SAMN06555607 | SAMN08274625 | SAMN03135516 |              | SAMN23523469 |              | SAMN06113184 |              |
| SAMN02666872  | SAMN04575407 | SAMN06555610 | SAMN08274646 | SAMN03135517 |              | SAMN23523468 |              | SAMN06113185 |              |
| SAMN02666874  | SAMN04575423 | SAMN06555606 | SAMN08274628 | SAMN03135537 |              | SAMN10352998 |              | SAMN15638749 |              |
| SAMN02666876  | SAMN04575408 | SAMN06555601 | SAMN08274650 | SAMN06645600 |              | SAMN08097737 |              | SAMN15638748 |              |
| SAMN02666880  | SAMN04575439 | SAMN06555602 | SAMN03897566 | SAMN03135511 |              | SAMN08097731 |              | SAMN11318567 |              |
| SAMN02666875  | SAMN04506950 | SAMN02887168 | SAMN02709385 | SAMN03135512 |              | SAMN12262208 |              | SAMN11318570 |              |
| SAMN13286390  | SAMN04547030 | SAMN03260235 | SAMN02709397 | SAMN06645597 |              | SAMN12230436 |              | SAMN11371679 |              |
| SAMN13286395  | SAMN04506962 | SAMN02887167 | SAMN02709396 | SAMN03135510 |              | SAMN02569968 |              | SAMN11371677 |              |
| SAMN13286389  | SAMN04506955 | SAMN16826909 | SAMN02709362 | SAMN06645598 |              | SAMN11491410 |              | SAMN11318753 |              |
| SAMN13286391  | SAMN04539452 | SAMN03097579 | SAMN03097642 | SAMN04943311 |              | SAMN11491435 |              | SAMN03736712 |              |
| SAMN13286394  | SAMN04575383 | SAMN03097576 | SAMN03285264 | SAMN02991391 |              | SAMN02567864 |              | SAMN12822632 |              |
| SAMN13286392  | SAMN04575415 | SAMN03097580 | SAMN03285263 | SAMN02991381 |              | SAMN12230499 |              | SAMN12783937 |              |
| SAMN03736764  | SAMN04575425 | SAMN03097578 | SAMN02567794 | SAMN02991387 |              | SAMN12230515 |              | SAMN11310117 |              |
| SAMN05521541  | SAMN04506960 | SAMN06645596 | SAMN03135520 | SAMN02990454 |              | SAMN02912058 |              | SAMN11310118 |              |
| SAMN03135524  | SAMN04506961 | SAMN06645595 | SAMN03135518 | SAMN02991383 |              | SAMN02912060 |              | SAMN11310160 |              |
| SAMN03135523  | SAMN04506958 | SAMN02924006 | SAMN03135535 | SAMN02990456 |              | SAMN01939116 |              | SAMN04600027 |              |
| SAMN03736730  | SAMN04522131 | SAMN02924007 | SAMN03135536 | SAMN02991378 |              | SAMN07560063 |              | SAMN04600026 |              |
| SAMN03736767  | SAMN04522130 | SAMN16826816 | SAMN03135521 | SAMN02990452 |              | SAMN07560054 |              | SAMN04600041 |              |
| SAMN07177538  | SAMN24693939 | SAMN03702791 | SAMN03135522 | SAMN02990456 |              | SAMN07560057 |              | SAMN04600054 |              |
| SAMN04146103  | SAMN24693938 | SAMN03702786 | SAMN03135519 | SAMN02991390 |              | SAMN05179355 |              | SAMN03168667 |              |
| SAMN10756631  | SAMN13961219 | SAMN03702785 | SAMN03135529 | SAMN02991379 |              | SAMN08163920 |              | SAMN03168669 |              |
| SAMN19354052  | SAMN18093947 | SAMN03702789 | SAMN03135530 | SAMN02991386 |              | SAMN08163922 |              | SAMN16813072 |              |
| SAMN19354215  | SAMN19368296 | SAMN03702790 | SAMN03135534 | SAMN02990453 |              | SAMN06669436 |              | SAMN16814580 |              |
| SAMN19353849  | SAMN19488895 | SAMN03702799 | SAMN03135533 | SAMN02991388 |              | SAMN08163914 |              | SAMN16815324 |              |
| SAMN19353708  | SAMN19696758 | SAMN03702800 | SAMN03135532 | SAMN02991382 |              | SAMN04117176 |              | SAMN16816031 |              |
| SAMN02937514  | SAMN07552046 | SAMN03702802 | SAMN03015665 | SAMN02991390 |              | SAMN04192109 |              | SAMN16816789 |              |
| SAMN02937515  | SAMN07552031 | SAMN03702805 | SAMN02709380 | SAMN03023705 |              | SAMN04192105 |              | SAMN16817018 |              |
| SAMN06240079  | SAMN07552032 | SAMN03702792 | SAMN02709383 | SAMN03023706 |              | SAMN02567871 |              | SAMN16817770 |              |
| SAMN03218398  | SAMN07552045 | SAMN03702801 | SAMN02709378 | SAMN03023707 |              | SAMN04102353 |              | SAMN16822410 |              |
| SAMN03218401  | SAMN15072558 | SAMN03702795 | SAMN02709360 | SAMN03023708 |              | SAMN04102354 |              | SAMN16822405 |              |
| SAMN03218400  | SAMN12547590 | SAMN03702796 | SAMN02850679 | SAMN03002777 |              | SAMN03983448 |              | SAMN16825949 |              |
| SAMN03218403  | SAMN12547587 | SAMN03702803 | SAMN02850678 | SAMN03002782 |              | SAMN02567860 |              | SAMN16825974 |              |
| SAMN03218399  | SAMN12642147 | SAMN03702804 | SAMN02709382 | SAMN03002788 |              | SAMN02567859 |              | SAMN16826074 |              |
| SAMN02383870  | SAMN12642333 | SAMN03702797 | SAMN02709407 | SAMN03002785 |              | SAMN01939125 |              | SAMN16826319 |              |
| SAMN02769767  | SAMN14096434 | SAMN04146147 | SAMN02709381 | SAMN03002785 |              | SAMN02850685 |              | SAMN16826313 |              |
| SAMN02769766  | SAMN14096444 | SAMN03085716 | SAMN02709379 | SAMN03002788 |              | SAMN02567863 |              | SAMN17188781 |              |
| SAMN022922665 | SAMN06005706 | SAMN03085717 | SAMN02953935 | SAMN03002789 |              | SAMN03656762 |              | SAMN16813067 |              |
| SAMN022922666 | SAMN03165750 | SAMN02570799 | SAMN02953937 | SAMN03002784 |              | SAMN02922246 |              | SAMN16813085 |              |
| SAMN15969076  | SAMN05191814 | SAMN02570800 | SAMN02953934 | SAMN03002786 |              | SAMN02922247 |              | SAMN16813125 |              |
| SAMN04358689  | SAMN06005707 | SAMN07258003 | SAMN03285164 | SAMN03002787 |              | SAMN02419859 |              | SAMN16814156 |              |
| SAMN04358690  | SAMN07571685 | SAMN06645608 | SAMN03285163 | SAMN02991374 |              | SAMN02922242 |              | SAMN16814174 |              |
| SAMN03285311  | SAMN07571688 | SAMN03135538 | SAMN03285135 | SAMN02990446 |              | SAMN02922243 |              | SAMN16814310 |              |
| SAMN04358691  | SAMN12286920 | SAMN06240119 | SAMN03285134 | SAMN02990445 |              | SAMN02922244 |              | SAMN16814349 |              |
| SAMN05462169  | SAMN12286909 | SAMN06240121 | SAMN03285136 | SAMN02990449 |              | SAMN02922245 |              | SAMN16814381 |              |
| SAMN04386791  | SAMN07444219 | SAMN06240118 | SAMN03285132 | SAMN02990450 |              | SAMN10393075 |              | SAMN16814579 |              |
| SAMN04386792  | SAMN07571689 | SAMN06240120 | SAMN03285133 | SAMN02991375 |              | SAMN10393070 |              | SAMN16814447 |              |
| SAMN11478342  | SAMN07571687 | SAMN23523484 | SAMN03285131 | SAMN02990447 |              | SAMN10393033 |              | SAMN16815203 |              |
| SAMN03703776  | SAMN07571683 | SAMN23523483 | SAMN03285204 | SAMN02991377 |              | SAMN10393030 |              | SAMN16815201 |              |
| SAMN03703780  | SAMN12684842 | SAMN06240078 | SAMN03285203 | SAMN02991392 |              | SAMN10393045 |              | SAMN16815285 |              |
| SAMN03703788  | SAMN12684847 | SAMN06240055 | SAMN03285228 | SAMN02953500 |              | SAMN10393067 |              | SAMN16815322 |              |
| SAMN03703779  | SAMN06005712 | SAMN22401822 | SAMN03285227 | SAMN02953501 |              | SAMN10393018 |              | SAMN16816105 |              |
| SAMN03770170  | SAMN06700603 | SAMN26214649 | SAMN12035822 | SAMN03462163 |              | SAMN10393044 |              | SAMN16817027 |              |
| SAMN03770154  | SAMN02769709 | SAMN26218028 | SAMN04929609 | SAMN03462161 |              | SAMN10393021 |              | SAMN16817753 |              |
| SAMN06242534  | SAMN03277781 | SAMN03287226 | SAMN03285194 | SAMN03218268 |              | SAMN10393032 |              | SAMN16818242 |              |
| SAMN06242522  | SAMN03736704 | SAMN03287236 | SAMN03285193 | SAMN06645656 |              | SAMN10389891 |              | SAMN16826055 |              |
| SAMN06242535  | SAMN03285200 | SAMN03287229 | SAMN07519901 | SAMN06645603 |              | SAMN10389887 |              | SAMN16826317 |              |
| SAMN06242514  | SAMN03431388 | SAMN03287230 | SAMN07520046 | SAMN02924077 |              | SAMN10389889 |              | SAMN16826435 |              |
| SAMN06242536  | SAMN03431389 | SAMN03287232 | SAMN03135503 | SAMN02924071 |              | SAMN10389896 |              | SAMN16826905 |              |
| SAMN05821180  | SAMN03431390 | SAMN03287225 | SAMN03135505 | SAMN07554890 |              | SAMN03760076 |              | SAMN07188242 |              |
| SAMN03465571  | SAMN03431392 | SAMN03287224 | SAMN03135507 | SAMN02924074 |              | SAMN01939115 |              | SAMN18800683 |              |
| SAMN03465570  | SAMN03431391 | SAMN03287231 | SAMN03135504 | SAMN07554894 |              | SAMN06890560 |              | SAMN16826459 |              |
| SAMN03465569  | SAMN02769710 | SAMN03287234 | SAMN03135506 | SAMN02924075 |              | SAMN06477572 |              | SAMN16816187 |              |
| SAMN03465573  | SAMN02769679 | SAMN03287237 | SAMN07520045 | SAMN02924076 |              | SAMN06477565 |              | SAMN15508345 |              |
| SAMN03465572  | SAMN02921771 | SAMN02797538 | SAMN07520051 | SAMN07554891 |              | SAMN06475417 |              | SAMN16814357 |              |
| SAMN03465574  | SAMN02921772 | SAMN02797539 | SAMN07520052 | SAMN07554893 |              | SAMN06476216 |              | SAMN16814443 |              |
| SAMN09984273  | SAMN02566980 | SAMN01939109 | SAMN03135508 | SAMN16826025 |              | SAMN06476209 |              | SAMN16817769 |              |
| SAMN09986740  | SAMN02566981 | SAMN03278634 | SAMN03135509 | SAMN16825969 |              | SAMN06476236 |              | SAMN16814440 |              |
| SAMN26027220  | SAMN02769680 | SAMN03278637 | SAMN02937458 | SAMN16826247 |              | SAMN10460979 |              | SAMN16826    |              |

| Poultry      |              | Seafood      |               | Vegetables    |              | Clinical Samples |              |
|--------------|--------------|--------------|---------------|---------------|--------------|------------------|--------------|
| SAMN02922173 | SAMN16815204 | SAMN02937501 | SAMN10977210  | SAMN21582201  | SAMN15913301 | SAMN09756851     | SAMN03354313 |
| SAMN02922174 | SAMN16812961 | SAMN02937503 | SAMN004146069 | SAMN06555523  | SAMN09953956 | SAMN09756858     | SAMN11268677 |
| SAMN02922175 | SAMN16813075 | SAMN02937504 | SAMN003736731 | SAMN06555522  | SAMN10026609 | SAMN15913281     | SAMN09756873 |
| SAMN06477613 | SAMN16815286 | SAMN02923311 | SAMN003736755 | SAMN003787623 | SAMN10026594 | SAMN15913262     | SAMN07831756 |
| SAMN13047656 | SAMN16816124 | SAMN02923310 | SAMN003736726 | SAMN003787625 | SAMN10026591 | SAMN15970354     | SAMN09756840 |
| SAMN13047990 | SAMN16816128 | SAMN02923308 | SAMN003736729 | SAMN04902934  | SAMN10026589 | SAMN10083716     | SAMN06240095 |
| SAMN04858632 | SAMN16817021 | SAMN02923309 | SAMN004146134 | SAMN006457941 | SAMN10026607 | SAMN10083723     | SAMN05371170 |
| SAMN13425986 | SAMN16821849 | SAMN02923298 | SAMN004146133 | SAMN003702235 | SAMN10083714 | SAMN10083738     | SAMN05371174 |
| SAMN17987503 | SAMN16825945 | SAMN02923504 | SAMN004146131 | SAMN003702236 | SAMN10083730 | SAMN15913273     | SAMN05371160 |
| SAMN08097585 | SAMN16825970 | SAMN02923499 | SAMN004146121 | SAMN003702237 | SAMN15913259 | SAMN15913267     | SAMN05371166 |
| SAMN03277808 | SAMN16826450 | SAMN02923500 | SAMN004146114 | SAMN003702238 | SAMN15913294 | SAMN10083733     | SAMN05371167 |
| SAMN03277808 | SAMN16826439 | SAMN04893488 | SAMN004146115 | SAMN04916636  | SAMN15913254 | SAMN15913264     | SAMN05371164 |
| SAMN05179362 | SAMN16826886 | SAMN04893493 | SAMN004146116 | SAMN04916637  | SAMN15970335 | SAMN15913263     | SAMN07831627 |
| SAMN03277699 | SAMN16814733 | SAMN04893494 | SAMN05900811  | SAMN04916638  | SAMN10026592 | SAMN15913300     | SAMN09756853 |
| SAMN03277810 | SAMN16822140 | SAMN04893495 | SAMN004146135 | SAMN04916641  | SAMN10026582 | SAMN09953964     | SAMN07831629 |
| SAMN03277666 | SAMN16826253 | SAMN04914047 | SAMN004146032 | SAMN05967956  | SAMN10026581 | SAMN10083717     | SAMN07831760 |
| SAMN03277667 | SAMN16814448 | SAMN04914048 | SAMN003736756 | SAMN04640315  | SAMN10083724 | SAMN10026605     | SAMN11268698 |
| SAMN03277702 | SAMN16814600 | SAMN04914049 | SAMN003736757 | SAMN04640301  | SAMN10083727 |                  | SAMN09756903 |
| SAMN04487283 | SAMN16815196 | SAMN04914050 | SAMN05521497  | SAMN04640307  | SAMN15913290 |                  | SAMN11268717 |
| SAMN04146078 | SAMN16817024 | SAMN04914060 | SAMN05900814  | SAMN04640310  | SAMN15913279 |                  | SAMN02381991 |
| SAMN04146093 |              | SAMN02921927 | SAMN05521570  | SAMN08040165  | SAMN10083713 |                  | SAMN02399607 |
| SAMN04146075 |              | SAMN02921928 | SAMN11803304  | SAMN06256026  | SAMN10083731 |                  | SAMN02389107 |
| SAMN07791951 |              | SAMN02921930 | SAMN05233165  | SAMN004148255 | SAMN15913274 |                  | SAMN02381990 |
| SAMN05384842 |              | SAMN02921929 | SAMN04544913  | SAMN05371084  | SAMN20248553 |                  | SAMN02402290 |
| SAMN07312510 |              | SAMN02922005 | SAMN05233164  | SAMN02921341  | SAMN09953943 |                  | SAMN07831758 |
| SAMN10977201 |              | SAMN02922085 | SAMN05233166  | SAMN02921339  | SAMN09953959 |                  | SAMN07831759 |
| SAMN05521551 |              | SAMN02922004 | SAMN05233169  | SAMN02921338  | SAMN09953958 |                  | SAMN09756862 |
| SAMN05521545 |              | SAMN02922087 | SAMN05233170  | SAMN02921340  | SAMN10026608 |                  | SAMN09756860 |
| SAMN04487243 |              | SAMN02922006 | SAMN003736710 | SAMN16791495  | SAMN10026610 |                  | SAMN09756859 |
| SAMN04487240 |              | SAMN02922007 | SAMN003736709 | SAMN16792401  | SAMN15913255 |                  | SAMN09756842 |
| SAMN05900843 |              | SAMN02400355 | SAMN003736766 | SAMN12056316  | SAMN15970356 |                  | SAMN09756861 |
| SAMN07823453 |              | SAMN02400356 | SAMN003724505 | SAMN12056313  | SAMN20248558 |                  | SAMN14400383 |
| SAMN03736702 |              | SAMN02921358 | SAMN003724504 | SAMN004155494 | SAMN15913299 |                  | SAMN14400408 |
| SAMN04487279 |              | SAMN02922612 | SAMN02937472  | SAMN04991858  | SAMN10083721 |                  | SAMN03277635 |
| SAMN04487255 |              | SAMN02921433 | SAMN02921899  | SAMN004155489 | SAMN09953933 |                  | SAMN03354302 |
| SAMN04487242 |              | SAMN02922084 | SAMN02921902  | SAMN004155490 | SAMN09953954 |                  | SAMN03277636 |
| SAMN02921631 |              | SAMN02921981 | SAMN02921789  | SAMN11491398  | SAMN09953961 |                  | SAMN03277671 |
| SAMN02921632 |              | SAMN02923414 | SAMN06200231  | SAMN02677677  | SAMN15913252 |                  | SAMN14400405 |
| SAMN03277793 |              | SAMN03198663 | SAMN03431378  | SAMN02677678  | SAMN20248551 |                  | SAMN12610330 |
| SAMN03702261 |              | SAMN06142591 | SAMN07340517  | SAMN02677679  | SAMN09953932 |                  | SAMN12610365 |
| SAMN03702242 |              | SAMN02923489 | SAMN07340518  | SAMN02677680  | SAMN09953931 |                  | SAMN02769705 |
| SAMN17188176 |              | SAMN02923382 | SAMN07340520  | SAMN02677681  | SAMN09953934 |                  | SAMN02769705 |
| SAMN18807072 |              | SAMN02870507 | SAMN07340527  | SAMN02677682  | SAMN09953955 |                  | SAMN22060992 |
| SAMN16814128 |              | SAMN02923395 | SAMN07340516  | SAMN02677683  | SAMN10083725 |                  | SAMN22060940 |
| SAMN16816223 |              | SAMN02923702 | SAMN02921967  | SAMN02677686  | SAMN15913291 |                  | SAMN02769789 |
| SAMN16818241 |              | SAMN02923307 | SAMN13013045  | SAMN02850676  | SAMN15913284 |                  | SAMN02769788 |
| SAMN16825942 |              | SAMN02922492 |               | SAMN004126428 | SAMN15913283 |                  | SAMN02769790 |
| SAMN16825959 |              | SAMN02923321 |               | SAMN02677687  | SAMN15970341 |                  | SAMN02769791 |
| SAMN16826279 |              | SAMN02923320 |               | SAMN02677688  | SAMN15970340 |                  | SAMN03354304 |
| SAMN16826283 |              | SAMN02923317 |               | SAMN02677689  | SAMN15970338 |                  | SAMN02769793 |
| SAMN16826324 |              | SAMN02923319 |               | SAMN03285248  | SAMN15970337 |                  | SAMN02769792 |
| SAMN16826478 |              | SAMN02923318 |               | SAMN03285247  | SAMN15970353 |                  | SAMN02769794 |
| SAMN16946591 |              | SAMN02922493 |               | SAMN03285250  | SAMN15970352 |                  | SAMN02769778 |
| SAMN18800691 |              | SAMN02937500 |               | SAMN03285249  | SAMN20248550 |                  | SAMN02769776 |
| SAMN18800681 |              | SAMN02923306 |               | SAMN02850684  | SAMN10083729 |                  | SAMN03277683 |
| SAMN16816007 |              | SAMN02923305 |               | SAMN03354356  | SAMN10026590 |                  | SAMN03277676 |
| SAMN16814148 |              | SAMN02923304 |               | SAMN02689388  | SAMN15913280 |                  | SAMN08134158 |
| SAMN16825976 |              | SAMN02923302 |               | SAMN02689388  | SAMN09953937 |                  | SAMN09756855 |
| SAMN16826090 |              | SAMN02923303 |               | SAMN02923022  | SAMN09953940 |                  | SAMN06240101 |
| SAMN16814346 |              | SAMN02923301 |               | SAMN02923023  | SAMN10026579 |                  | SAMN06240098 |
| SAMN16815308 |              | SAMN02923300 |               | SAMN02923025  | SAMN10026602 |                  | SAMN03277713 |
| SAMN16822840 |              | SAMN02923299 |               | SAMN02923024  | SAMN10026600 |                  | SAMN09756938 |
| SAMN16826314 |              | SAMN02922491 |               | SAMN02923026  | SAMN10083726 |                  | SAMN09756990 |
| SAMN16826841 |              | SAMN06446243 |               | SAMN02923027  | SAMN15913257 |                  | SAMN08134176 |
| SAMN15508338 |              | SAMN02709176 |               | SAMN02923021  | SAMN15913298 |                  | SAMN14424504 |
| SAMN16813071 |              | SAMN02921926 |               | SAMN02420421  | SAMN15913293 |                  | SAMN06240096 |
| SAMN16814577 |              | SAMN02921925 |               | SAMN02420422  | SAMN15913256 |                  | SAMN03277774 |
| SAMN16817060 |              | SAMN02709221 |               | SAMN07204969  | SAMN15913289 |                  | SAMN06240107 |
| SAMN16822767 |              | SAMN02921698 |               | SAMN04621511  | SAMN15913287 |                  | SAMN09756905 |
| SAMN17188254 |              | SAMN02921699 |               | SAMN05967929  | SAMN15913286 |                  | SAMN09756940 |
| SAMN17188262 |              | SAMN03140285 |               | SAMN14901720  | SAMN15913285 |                  | SAMN02389791 |
| SAMN17188501 |              | SAMN05191809 |               | SAMN14901719  | SAMN15913282 |                  | SAMN02389113 |
| SAMN16812873 |              | SAMN06561800 |               | SAMN03285252  | SAMN15913278 |                  | SAMN02389111 |
| SAMN16826480 |              | SAMN03140284 |               | SAMN03285253  | SAMN15913277 |                  | SAMN02381993 |
| SAMN17188259 |              | SAMN03140286 |               | SAMN03285254  | SAMN15913275 |                  | SAMN09756899 |
| SAMN17015185 |              | SAMN05191808 |               | SAMN03285255  | SAMN15913272 |                  | SAMN09756901 |
| SAMN16815988 |              | SAMN13059119 |               | SAMN03285256  | SAMN15913270 |                  | SAMN02389108 |
| SAMN16817003 |              | SAMN13059131 |               | SAMN04437620  | SAMN15913269 |                  | SAMN02389792 |
| SAMN16816250 |              | SAMN13059120 |               | SAMN04437622  | SAMN15913266 |                  | SAMN09756948 |
| SAMN16826058 |              | SAMN13059121 |               | SAMN04437623  | SAMN15970342 |                  | SAMN02389109 |
| SAMN17188241 |              | SAMN13059993 |               | SAMN04437621  | SAMN15970358 |                  | SAMN09756896 |
| SAMN16816406 |              | SAMN13059132 |               | SAMN03285251  | SAMN15970355 |                  | SAMN02389112 |
| SAMN16817036 |              | SAMN13059130 |               | SAMN03893567  | SAMN15970351 |                  | SAMN09756946 |
| SAMN16826622 |              | SAMN06561809 |               | SAMN02769764  | SAMN15970350 |                  | SAMN20504393 |
| SAMN16812857 |              | SAMN06561811 |               | SAMN02769763  | SAMN15970349 |                  | SAMN20504392 |
| SAMN16814352 |              | SAMN03702244 |               | SAMN02769762  | SAMN15970346 |                  | SAMN03277696 |
| SAMN16816407 |              | SAMN03702240 |               | SAMN15913295  | SAMN20248557 |                  | SAMN08134186 |
| SAMN16821857 |              | SAMN03702241 |               | SAMN15913268  | SAMN20248556 |                  | SAMN06240097 |
| SAMN17188564 |              | SAMN08166092 |               | SAMN15913253  | SAMN20248552 |                  | SAMN07831758 |
| SAMN16813101 |              | SAMN02352654 |               | SAMN15970339  | SAMN09953962 |                  | SAMN07831759 |
| SAMN16814437 |              | SAMN08108723 |               | SAMN20248555  | SAMN09953944 |                  | SAMN09756862 |
| SAMN16826457 |              | SAMN05521501 |               | SAMN20248554  | SAMN09953941 |                  | SAMN09756860 |
| SAMN17015077 |              | SAMN05521500 |               | SAMN10026598  | SAMN09953935 |                  | SAMN09756859 |
| SAMN17188902 |              | SAMN05521504 |               | SAMN10083720  | SAMN09953939 |                  | SAMN09756842 |
| SAMN15508303 |              | SAMN05521503 |               | SAMN10083737  | SAMN10083719 |                  | SAMN09756861 |
| SAMN15508315 |              | SAMN05521502 |               | SAMN10083739  | SAMN10083732 |                  | SAMN06240105 |
| SAMN16826244 |              | SAMN05521499 |               | SAMN15913292  | SAMN15970336 |                  | SAMN03354316 |
| SAMN16826282 |              | SAMN05384833 |               | SAMN15913271  | SAMN15970344 |                  | SAMN03354317 |
| SAMN16814153 |              | SAMN0376725  |               | SAMN15913296  | SAMN09953945 |                  | SAMN03354315 |
