# Supplementary material for: A Machine Learning Model for Food Source Attribution of Listeria monocytogenes
Source: MDPI journal article supplement (doi:10.3390/pathogens11060691), 2022-06-16
Supplement: s1 [file s1]

**Supplementary Table S1. Statistics of the confusion matrices for LB, RF, GBM, and SVMR (train and test models).**

| <b>LB</b>               |              |               |                     |             |                |                |                   |
|-------------------------|--------------|---------------|---------------------|-------------|----------------|----------------|-------------------|
|                         | <b>Dairy</b> | <b>Fruits</b> | <b>Leafy greens</b> | <b>Meat</b> | <b>Poultry</b> | <b>Seafood</b> | <b>Vegetables</b> |
| <b>Sensitivity</b>      | 0.780        | 0.898         | 0.548               | 0.484       | 0.447          | 0.750          | 0.702             |
| <b>Specificity</b>      | 0.938        | 0.914         | 0.961               | 0.952       | 0.957          | 0.969          | 0.970             |
| <b>Pos. Pred. Value</b> | 0.708        | 0.793         | 0.567               | 0.484       | 0.548          | 0.750          | 0.839             |
| <b>Neg. Pred. Value</b> | 0.957        | 0.961         | 0.958               | 0.952       | 0.937          | 0.969          | 0.935             |
| <b>Accuracy</b>         | 0.859        | 0.906         | 0.755               | 0.718       | 0.702          | 0.860          | 0.836             |

| <b>RF</b>               |              |               |                     |             |                |                |                   |
|-------------------------|--------------|---------------|---------------------|-------------|----------------|----------------|-------------------|
|                         | <b>Dairy</b> | <b>Fruits</b> | <b>Leafy greens</b> | <b>Meat</b> | <b>Poultry</b> | <b>Seafood</b> | <b>Vegetables</b> |
| <b>Sensitivity</b>      | 0.830        | 0.835         | 0.565               | 0.500       | 0.458          | 0.696          | 0.733             |
| <b>Specificity</b>      | 0.937        | 0.879         | 0.964               | 0.972       | 0.952          | 0.980          | 0.974             |
| <b>Pos. Pred. Value</b> | 0.759        | 0.755         | 0.591               | 0.611       | 0.478          | 0.762          | 0.846             |
| <b>Neg. Pred. Value</b> | 0.959        | 0.923         | 0.960               | 0.957       | 0.948          | 0.972          | 0.949             |
| <b>Accuracy</b>         | 0.884        | 0.857         | 0.765               | 0.736       | 0.705          | 0.838          | 0.854             |

| <b>GBM</b>              |              |               |                     |             |                |                |                   |
|-------------------------|--------------|---------------|---------------------|-------------|----------------|----------------|-------------------|
|                         | <b>Dairy</b> | <b>Fruits</b> | <b>Leafy greens</b> | <b>Meat</b> | <b>Poultry</b> | <b>Seafood</b> | <b>Vegetables</b> |
| <b>Sensitivity</b>      | 0.797        | 0.878         | 0.452               | 0.581       | 0.421          | 0.625          | 0.716             |
| <b>Specificity</b>      | 0.954        | 0.899         | 0.976               | 0.952       | 0.936          | 0.960          | 0.963             |
| <b>Pos. Pred. Value</b> | 0.771        | 0.761         | 0.636               | 0.529       | 0.432          | 0.658          | 0.814             |
| <b>Neg. Pred. Value</b> | 0.960        | 0.952         | 0.950               | 0.961       | 0.933          | 0.954          | 0.938             |
| <b>Accuracy</b>         | 0.875        | 0.888         | 0.714               | 0.766       | 0.678          | 0.792          | 0.840             |

| <b>SVMR</b>             |              |               |                     |             |                |                |                   |
|-------------------------|--------------|---------------|---------------------|-------------|----------------|----------------|-------------------|
|                         | <b>Dairy</b> | <b>Fruits</b> | <b>Leafy greens</b> | <b>Meat</b> | <b>Poultry</b> | <b>Seafood</b> | <b>Vegetables</b> |
| <b>Sensitivity</b>      | 0.729        | 0.878         | 0.161               | 0.323       | 0.263          | 0.600          | 0.716             |
| <b>Specificity</b>      | 0.866        | 0.823         | 1.000               | 0.994       | 0.979          | 0.944          | 0.923             |
| <b>Pos. Pred. Value</b> | 0.512        | 0.647         | 1.000               | 0.833       | 0.588          | 0.571          | 0.676             |
| <b>Neg. Pred. Value</b> | 0.943        | 0.948         | 0.928               | 0.940       | 0.919          | 0.950          | 0.935             |
| <b>Accuracy</b>         | 0.797        | 0.850         | 0.581               | 0.658       | 0.621          | 0.772          | 0.820             |

**Pos. pred.:** positive predictive; **Neg. pred.:** negative predictive.
