# Supplementary material for: A Machine Learning Model for Food Source Attribution of Listeria monocytogenes
Source: MDPI journal article supplement (doi:10.3390/pathogens11060691), 2022-06-16
Supplement: s1 [file s1]

**Supplementary Table S2. Statistics of the confusion matrices for the final (best performing) model (LB).**

| <b>LB</b>               |              |               |                     |             |                |                |                   |
|-------------------------|--------------|---------------|---------------------|-------------|----------------|----------------|-------------------|
|                         | <b>Dairy</b> | <b>Fruits</b> | <b>Leafy greens</b> | <b>Meat</b> | <b>Poultry</b> | <b>Seafood</b> | <b>Vegetables</b> |
| <b>Sensitivity</b>      | 0.918        | 0.966         | 0.800               | 0.667       | 0.636          | 0.933          | 0.960             |
| <b>Specificity</b>      | 0.970        | 0.953         | 1.000               | 0.996       | 0.996          | 0.976          | 0.974             |
| <b>Pos. Pred. Value</b> | 0.865        | 0.904         | 1.000               | 0.933       | 0.933          | 0.824          | 0.889             |
| <b>Neg. Pred. Value</b> | 0.983        | 0.984         | 0.985               | 0.974       | 0.970          | 0.992          | 0.991             |
| <b>Accuracy</b>         | 0.944        | 0.960         | 0.900               | 0.831       | 0.816          | 0.955          | 0.967             |

**Pos. pred.:** positive predictive; **Neg. pred.:** negative predictive.
